# Supplementary material
Source: Royal Society of Chemistry journal article supplement (doi:10.1039/d6cc01317a)
Supplement: d6cc01317a1.pdf [file d6cc01317a1.pdf]

1

## Supplementary Information

### 2 Nitrogen doping boosted aqueous Zn-CO<sub>2</sub> batteries producing methane and 3 electricity simultaneously

4 Rani Misbah,<sup>1,#</sup> Di Li,<sup>1,#</sup> Hameed Sidra,<sup>1</sup> Muhammad Ehtasham Ul Haq,<sup>2</sup> Tengda Lu,<sup>1</sup> Sheng  
5 Chen,<sup>2</sup> Qiang Li,<sup>1</sup> and Jingjing Duan<sup>1,\*</sup>

6 <sup>1</sup>MIIT Key Laboratory of Thermal Control of Electronic Equipment, School of Energy and Power  
7 Engineering, Nanjing University of Science and Technology, Nanjing, 210094, China

8 <sup>2</sup>School of Chemistry and Chemical Engineering, Nanjing University of Science and Technology,  
9 Nanjing, 210094, China

10 E-mail: jingjing.duan@njust.edu.cn

#### 11 1. Figure and Table Captions

12 **Figure S1.** The Cu-BTC material: (a) SEM image and (b) EDX mapping images of Cu, O and C  
13 elements.

14 **Figure S2.** XPS survey spectra of the (a) Cu-BTC and (b) N-Cu-BTC catalyst.

15 **Figure S3.** The O 1s XPS spectra of Cu-BTC and N-Cu-BTC.

16 **Figure S4.** Photographs of (a) the nickel-foam counter electrode, (b) the catalyst-coated working  
17 electrode and (c) schematic illustration of the three-chamber flow-type eCO<sub>2</sub>RR cell assembly.

18 **Figure S5.** (a) CV and (b) LSV curves of eCO<sub>2</sub>RR promoted by Cu-BTC and N-Cu-BTC.

19 **Figure S6.** (a) EF<sub>CH<sub>4</sub></sub> and (b) FE<sub>H<sub>2</sub></sub> of eCO<sub>2</sub>RR catalyzed by Cu-BTC and N-Cu-BTC.

20 **Figure S7.** Tafel plots of eCO<sub>2</sub>RR catalyzed by Cu-BTC and N-Cu-BTC.

21 **Figure S8.** Partial current density for CH<sub>4</sub> formation during eCO<sub>2</sub>RR catalyzed by Cu-BTC and  
22 N-Cu-BTC.

23 **Figure S9:** The step diagram corrected by VASPSOL considering the solvation effect.

24 **Figure S10.** (a) The Zn anode and (b) N-Cu-BTC working electrode used in the three-chamber  
25 flow-type AZCB.

26 **Figure S11.** (a) OCP curves of the Cu-BTC constructed AZCB against CO<sub>2</sub> and Ar  
27 gases; (b) Discharge response along power density.

28 **Figure S12.** (a) Polarization charge and discharge curves and (b) Power density curves for AZCBs  
29 using Cu-BTC and N-Cu-BTC.

30 **Figure S13.** Comparison of power densities between this work and reported data with CH<sub>4</sub> as the  
31 eCO<sub>2</sub>RR product.

32 **Figure S14.** The galvanostatic cyclability curve at a current density of 0.5 mA cm<sup>-2</sup> for Cu-BTC.

33 **Figure S15.** Digital photograph for single bulb illuminated by three series of an N-Cu-BTC  
34 AZCBs.

35 **Table S1.** Comparison of FE<sub>CH<sub>4</sub></sub> of eCO<sub>2</sub>RR using as prepared electrode.

36 **Table S2.** Comparison of practical discharge capacity and Zn utilization of the Zn–CO<sub>2</sub> battery  
37 with the theoretical Zn capacity at different discharge currents.

38 **Table S3.** Comparison of aqueous Zn-CO<sub>2</sub> battery performance with reported data.

## 39 **2. Experimental Section**

### 40 **2.1 Chemicals**

41 The reagents included: copper nitrate (Cu(NO<sub>3</sub>)<sub>2</sub>·3H<sub>2</sub>O, 98%, (Sigma-Aldrich)1,3,5-  
42 benzenetricarboxylic acid (H<sub>3</sub>BTC, 99%, (Sigma-Aldrich), absolute ethanol (C<sub>2</sub>H<sub>5</sub>OH, 99) were  
43 purchased from SCR, Chemical (ptv) Ltd, urea (CO(NH<sub>2</sub>)<sub>2</sub>, 99%, (Sigma-Aldrich), nitrogen gas  
44 (N<sub>2</sub>, 99.99%, Linde) . Nafion and de-ionized water, carbon dioxide (CO<sub>2</sub> 99.999%) purity were  
45 used. All chemicals are analytical grade and used without any further purification.

### 46 **2.2 Materials synthesis**

#### 47 **2.2.1 Synthesis of Cu-BTC**

48 Generally, Cu-BTC was synthesized via a solvothermal process. To begin, 2.0 g of copper nitrate  
49 trihydrate was dissolved in 50 mL of ethanol, while 1.0 g of 1,3,5-benzenetricarboxylic acid  
50 (H<sub>3</sub>BTC) was dissolved in a mixture of 30 mL of ethanol and 20 mL of deionized (DI) water.  
51 Above solutions were stirred separately to ensure complete dissolution, and then mixed by stirring  
52 for 15 minutes to form a homogeneous precursor solution. This solution was transferred into a 100  
53 mL Teflon-lined stainless-steel autoclave, sealed tightly, and heated at 80 °C for 72 hours for  
54 crystal growth. After which, the autoclave is allowed to cool naturally to room temperature. The  
55 blue crystalline product is obtained by vacuum filtration. To eliminate any residual unreacted  
56 precursors or impurities, the solid product is washed three times with ethanol and then dried in a  
57 vacuum oven at 80 °C for 12 hours.

#### 58 **2.2.2 Synthesis of N-Cu-BTC**

59 N-doped Cu-BTC was synthesized *via* a post-incorporation strategy using urea as the nitrogen  
60 source. In detail, pristine Cu-BTC was dispersed in an ethanol-DI water mixture, followed by  
61 addition of urea to ensure uniform interactions with MOF, and the suspension was then subjected  
62 to solvothermal treatment at 80 °C for 12 hours. During this process, urea gradually decomposed  
63 to provide nitrogen species that were incorporated into the ligand environment and coordinated  
64 with unsaturated Cu sites, resulting in effective nitrogen doping while maintaining the structural  
65 integrity of the framework. After cooling, the product was collected, thoroughly washed with  
66 ethanol, and vacuum-dried at 80 °C for 12 hours to obtain N-Cu-BTC.

### 67 **2.3 Physical characterizations**

68 The crystal structure of the as-prepared materials was also examined by powder X-ray diffraction  
69 analysis (XRD, Bruker AXS) at a scanning rate of 5°/min in the range of 20° to 80°. Fourier  
70 transform infrared (FTIR) spectroscopy was performed using an FTIR, Nicolet 6700,  
71 spectrometer. The surface morphologies and microstructural analysis of the materials were  
72 determined using Scanning Electron Microscopy (SEM, Hitachi S-4800 II, Japan). Energy-  
73 dispersive X-ray Spectroscopy (EDX) was used in conjunction with scanning electron microscopy  
74 (SEM) to obtain elemental composition analysis. X-ray Photoelectron Spectroscopy (XPS) was  
75 performed using a PHI 500 ESCA spectrometer to investigate the surface chemical states.

### 76 **2.4 Electrochemical measurements of eCO<sub>2</sub>RR**

77 Electrochemical testing of eCO<sub>2</sub>RR was conducted in a three-chamber flow-type electrolyser using  
78 a CHI electrochemical workstation (CHI 760E). The working electrode was prepared by coating  
79 the catalyst ink onto carbon paper with an exposed area of 1 × 1 cm<sup>2</sup> and a catalyst loading of 10  
80 mg cm<sup>-2</sup>. A nickel-foam electrode and an Ag/AgCl/saturated KCl electrode were used as the  
81 counter and reference electrodes, respectively. The electrolyte was 1 M KOH, and CO<sub>2</sub> was  
82 continuously supplied at 80 mL min<sup>-1</sup> to maintain saturation during eCO<sub>2</sub>RR. The anodic and  
83 cathodic chambers were separated by an FAA-3-50 anion-exchange membrane (Fumasep), which  
84 provided ionic conduction while minimizing electrolyte crossover. Cyclic voltammetry (CV) was  
85 performed at a scan rate of 0.1 V/s in the potential range of 0.0 V to -3.0 V (vs. reversible hydrogen  
86 electrode, RHE). Linear sweep voltammetry (LSV) was conducted with a scan rate of 0.01 V/s  
87 from 0 V to -3.0 V vs RHE. Electrochemical impedance (EIS) measurement was conducted over  
88 a frequency range of 0.01Hz to 10<sup>6</sup> Hz at an applied potential of -2.25V. All potentials were  
89 calibrated relative to the RHE using the equation:

90 
$$E_{\text{RHE}} = E_{\text{Ag/AgCl}} + 0.0591 \times \text{pH} + 0.197 \text{ V}$$

91 To further evaluate the reaction kinetics of the catalysts, Tafel plots were derived from the  
92 polarization data. The fitted Tafel slopes are 230 mV dec<sup>-1</sup> for Cu-BTC and 160 mV dec<sup>-1</sup> for N-  
93 Cu-BTC, indicating faster interfacial charge-transfer kinetics after nitrogen doping. In addition,  
94 the partial current density for CH<sub>4</sub> was calculated from the total current density and the  
95 corresponding FE<sub>CH<sub>4</sub></sub> values at different applied potentials. N-Cu-BTC exhibits a higher CH<sub>4</sub>  
96 partial current density than Cu-BTC over the investigated potential range, further confirming its  
97 superior catalytic activity and selectivity toward CH<sub>4</sub> formation.

98 Tafel plots were constructed by plotting potential (V vs RHE) against log<sub>10</sub>(j) and fitting the linear,  
99 kinetically controlled region (0.05-0.30 mA cm<sup>-2</sup>) to the Tafel equation:

100 
$$E = a + b \times \log_{10}(j)$$

101 where b is the Tafel slope.

## 102 **2.5 Analysis of eCO<sub>2</sub>RR products**

103 The gaseous products of eCO<sub>2</sub>RR were quantified using gas chromatography (GC), equipped with  
104 a thermal conductivity detector (TCD) for measuring H<sub>2</sub> and a flame ionization detector (FID) for  
105 measuring aliphatic hydrocarbons, such as CH<sub>4</sub> and C<sub>2</sub>H<sub>4</sub>. Calibration was conducted using  
106 reference gas mixtures with an established concentration for the calibration of each product. The  
107 Faraday efficiency (FE), current density, and selective reduction of CO<sub>2</sub> to CH<sub>4</sub> were investigated  
108 by applying over-potentials in a potential range of -1.0 V to -2.75 V vs RHE. The following  
109 formula can calculate the FE of products:

110 
$$FE(\%) = \left( \frac{n \times N_{\text{product}} \times F}{Q_{\text{total}}} \right) \times 100$$

111 • n is the number of electrons transferred during eCO<sub>2</sub>RR

112 • F is the Faraday constant (96485 C mol<sup>-1</sup>)

113 • N is the number of moles of product

114 • Q total is the total charge passed

115 CH<sub>4</sub> was quantified by gas chromatography during eCO<sub>2</sub>RR under continuous CO<sub>2</sub> supply,  
116 providing strong evidence for CO<sub>2</sub>-involved methane formation. In addition, isotope-tracing with

117 labeled CO<sub>2</sub> offers a rigorous route for direct carbon-source verification; under alkaline conditions,  
118 this can be expressed as  $^{13}\text{CO}_2 + 6\text{H}_2\text{O} + 8\text{e}^- \rightarrow ^{13}\text{CH}_4 + 8\text{OH}^-$ .

### 119 **2.5.1 Discussion of reaction kinetics and selectivity at negative potentials**

120 Although the optimal eCO<sub>2</sub>RR performance was obtained at a relatively negative potential, the  
121 reaction was conducted in strongly alkaline 1 M KOH within a three-chamber flow-type  
122 electrolyser under continuous CO<sub>2</sub> supply. Under these conditions, the reduced proton  
123 concentration helps suppress HER, while the flow-type configuration improves CO<sub>2</sub> transport to  
124 the cathode. In addition, the carbon-paper substrate provides a relatively hydrophobic gas-  
125 diffusion interface, which helps maintain CO<sub>2</sub> access and limit water access to the catalytic sites,  
126 suppressing HER. More importantly, N-Cu-BTC exhibits faster interfacial kinetics than Cu-BTC,  
127 as evidenced by its lower charge-transfer resistance, higher C<sub>dl</sub>, and smaller Tafel slope. In  
128 parallel, DFT calculations show that nitrogen incorporation lowers the free-energy barrier of the  
129 potential-determining \*CO → \*CHO step and enhances charge transfer between Cu sites and  
130 carbonaceous intermediates. These combined effects explain why CH<sub>4</sub> formation remains favored  
131 over HER even at relatively negative potentials.

### 132 **2.5.2 Ar control experiment for CH<sub>4</sub> verification**

133 To further examine the carbon origin of methane product, a control experiment was performed  
134 under identical eCO<sub>2</sub>RR conditions using Ar gas instead of CO<sub>2</sub> as the feeding gas. GC-FID  
135 analysis shows a clear CH<sub>4</sub> peak under CO<sub>2</sub> flow, whereas no detectable CH<sub>4</sub> peak is observed  
136 under Ar flow. Because CH<sub>4</sub> is detected only in the presence of CO<sub>2</sub> and disappear completely  
137 under Ar, this comparison strongly supports that methane formation originates from CO<sub>2</sub> reduction  
138 rather than from background contamination or other carbon sources in the system.

### 139 **2.6 Assembly of aqueous Zn-CO<sub>2</sub> Batteries**

140 The Zn-CO<sub>2</sub> battery measurements were also carried out in a three-chamber flow-type cell under  
141 continuous CO<sub>2</sub> and electrolyte flow, with two electrodes. For the cathode, the catalyst ink was  
142 spray-coated onto carbon paper with an exposed area of 1 × 1 cm<sup>2</sup>, corresponding to a catalyst  
143 loading of 10 mg cm<sup>-2</sup>. A polished Zn plate was used as the anode. The catholyte was 1 M KOH,  
144 and the anolyte was 6 M KOH + 0.2 M Zn(CH<sub>3</sub>COO)<sub>2</sub>, which are separated by an FAA-3-50 anion-  
145 exchange membrane (Fumasep) acting as the ion-conducting separator enabling anion transport  
146 between the two compartments while minimizing electrolyte crossover. During operation,  
147 electrons were transferred through the external circuit, whereas charge balance across the battery

148 was maintained by ion migration through the membrane. CO<sub>2</sub> was continuously introduced to the  
 149 cathode side during battery operation to maintain catholyte saturation. The three-chamber flow-  
 150 type design, together with flowing anolyte, catholyte, and gas, improve CO<sub>2</sub> utilization and reduces  
 151 product crossover. Various performance parameters were evaluated for the battery, including the  
 152 determination of the open-circuit potential (OCP) for stable performance and linear sweep  
 153 voltammetry (LSV) for assessing discharging and charging capabilities at a scan rate of 5 mV/s.

## 154 2.7 Parameter calculation for aqueous Zn-CO<sub>2</sub> batteries

155 Theoretical energy efficiency can be calculated using the following equation:

$$156 \quad EE = \frac{\Delta G_{output}}{\Delta G_{input}} = \frac{nE_{discharge}F + \Delta G_{CO_2 splitting}}{nE_{charge}F}$$

$$157 \quad \Delta G_{CO_2 splitting} = 257.38 \text{ kJmol}^{-1}$$

158 During the discharging process of AZCBs, the competitive hydrogen evolution reaction (HER)  
 159 produces H<sub>2</sub>, which affects the battery performance. The energy efficiency (EE) of AZCBs can be  
 160 calculated as follows:

$$161 \quad EE = \frac{\Delta G_{output}}{\Delta G_{input}} = \frac{nE_{discharge}F + FE_{CH_4} \times \Delta G_{CO_2 splitting} + FE_{HER} \times \Delta G_{H_2O splitting}}{nE_{charge}F}$$

$$162 \quad \Delta G_{H_2O splitting} = 257.38 \text{ KJmol}^{-1}$$

163 To calculate the theoretical potential (V) for AZCBs, the anodic and cathodic reactions are shown  
 164 as follows.

165 For the cathodic discharging of AZCBs, the following reaction happen:

166 **At the cathode:** (1 M KOH), pH =14

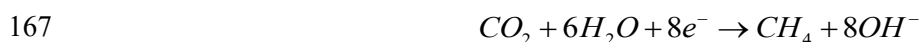

$$168 \quad E_c = E_{CO_2/CH_4}^\theta - \frac{RT}{nF} \ln \left[ \frac{1}{\alpha_{H^+}^2} \right] = -0.65 \text{ V} - \frac{8.314 \times 298.15}{8 \times 96485} \ln \frac{1}{(10^{-14})^2} = -0.857 \text{ V}$$

169 Where  $E_{CO_2/CH_4}^\theta = -0.65 \text{ V}$  vs. SHE

170 **At the anode:** (6 M KOH + 0.2 M Zn (CH<sub>3</sub>COO)<sub>2</sub>)

171 For the anodic discharging of AZCBs, the following reaction happen.

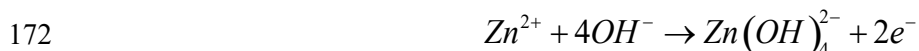

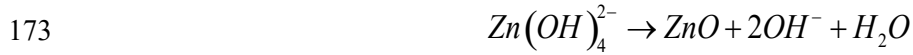

174 
$$E_a = E_{\text{ZnO}(\text{OH})_4^{2-}}^\theta - \frac{RT}{nF} \ln \left[ \frac{\alpha_{\text{Zn}}}{\alpha_{\text{Zn}(\text{OH})_4^{2-}}} \right] = -1.255\text{V} - \frac{8.314 \times 298.15}{8 \times 96485} \ln \left[ \frac{1}{0.2} \right] \text{V} = -1.260\text{V}$$

175 
$$E_{\text{ZnO}(\text{OH})_4^{2-}}^\theta = -1.255\text{V vs SHE}$$

176 Therefore, the overall battery reaction during discharging is as follows:

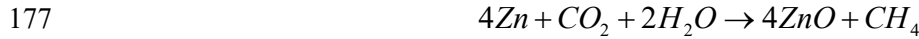

178 The theoretical potential of AZCBs should be calculated using the below equation:

179 
$$E_{\text{theo}} = E_c - E_a = -0.857\text{V} - (-1.260\text{V}) = 0.403\text{V}$$

180 Whereas R is 8.314 J K<sup>-1</sup> mol<sup>-1</sup> (molar gas constant), T = 298.15 K, n = 8 (total number of electrons  
181 transferred per mole of product), F = 96485 C mol<sup>-1</sup> (Faraday Constant), and α is the corresponding  
182 activity. The theoretical energy density can be calculated by multiplying the specific capacity by  
183 the theoretical potential of the system.

184 
$$ED_{\text{Zn-CO}_2} = C_{\text{Zn}} \times E_{\text{theo}} = 825\text{mAh}^{-1} \times 0.418\text{V} = 332.4\text{Whkg}^{-1}$$

185 C<sub>Zn</sub> is the theoretical energy density of AZCBs using Zn anodes.

186 Additionally, HER also occurs during battery discharging, competing with the CO<sub>2</sub>-to-CH<sub>4</sub> electro  
187 conversion process.

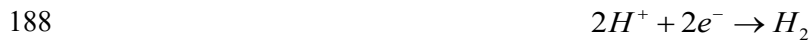

189 
$$E_c = E_{\text{H}^+/\text{H}_2}^\theta - \frac{RT}{nF} \ln \left[ \frac{\alpha_{\text{H}_2}}{\alpha_{\text{H}^+}^2} \right] = -0.83\text{V} - \frac{8.314 \times 298.15}{2 \times 96485} \ln \left[ \frac{1}{(10^{-14})^2} \right] \text{V} = -1.65\text{V}$$

190 
$$E_{\text{H}^+/\text{H}_2}^\theta = -0.83\text{V vs. SHE}$$

191 The overall reaction of the discharging process along Zn oxidation and HER:

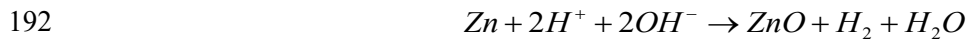

193 
$$E'_{\text{theo}} = E'_c - E_a = -1.65\text{V} - (-1.260\text{V}) = -0.39\text{V}$$

194 During charging, water oxidation reaction happens at the cathode as follows.

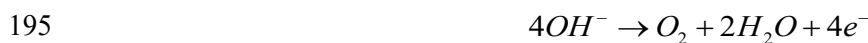

196 
$$E'_c = E_{\text{H}_2\text{O}/\text{O}_2}^\theta - \frac{RT}{nF} \ln \left[ \frac{\alpha_{\text{H}_2\text{O}}}{\alpha_{\text{O}_2}^{1/2} \alpha_{\text{H}^+}^2} \right] = 1.229\text{V} - \frac{8.314 \times 298.15}{4 \times 96485} \ln \left[ \frac{1}{1 \times (10^{-14})^2} \right] \text{V} = 0.814\text{V}$$

197 Where,

$$198 \quad E_{H_2O/O_2}^{\theta} = 1.229V \text{ vs. SHE}$$

199 While, the following reactions happen at the anode during charging.

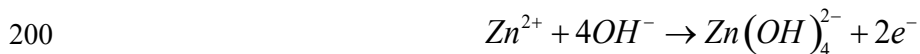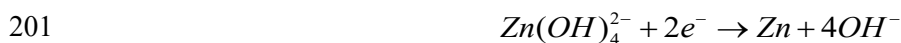

202 So, the overall reaction during charging is as follows:

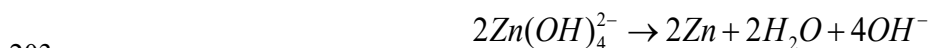

$$204 \quad E_{theo}'' = E_c'' - E_a = 0.814V - (-1.26 V) = 2.077V$$

205 During discharge, the N-Cu-BTC-coated cathode catalyzes CO<sub>2</sub> reduction into CH<sub>4</sub> (CO<sub>2</sub> + 8e +  
206 6H<sub>2</sub>O → CH<sub>4</sub> + 8OH<sup>-</sup>), while the Zn electrode is oxidized (Zn - 2e → Zn<sup>2+</sup>) in the alkaline Zn-  
207 containing anolyte. While during charging, the reverse process occurs, in which zinc-containing  
208 species are reduced and re-deposited on the Zn electrode (Zn<sup>2+</sup> + 2e → Zn), while the counter  
209 reaction in the opposite alkaline compartment is water oxidation (2H<sub>2</sub>O - 4e → O<sub>2</sub> + 4H<sup>+</sup>). The  
210 three-compartment cell configuration with an anion-exchange membrane minimizes crossover  
211 between the two electrode chambers. Moreover, charge and discharge are performed sequentially,  
212 so gaseous products generated during discharge are collected separately from the cathode outlet  
213 and were not directly mixed with those from the charging step.

#### 214 **2.7.1 Practical discharge capacity and Zn utilization**

215 The practical discharge capacity of the Zn-CO<sub>2</sub> battery was calculated from the galvanostatic  
216 discharge current and discharge time according to Q<sub>practical</sub>=I×t, where I is the discharge current  
217 and t is the discharge time. Using a Zn mass of 0.571 g and the theoretical specific capacity of Zn  
218 (820 mAh g<sup>-1</sup>), the theoretical capacity was calculated to be 468 mAh. Based on a fixed discharge  
219 time of 0.083 h (5 min), the practical capacities at 1–5 mA were 0.083, 0.166, 0.250, 0.333, and  
220 0.416 mAh, respectively, corresponding to specific capacities of 0.145, 0.291, 0.437, 0.583, and  
221 0.729 mAh g<sup>-1</sup> and Zn utilizations of 0.017, 0.035, 0.053, 0.071, and 0.088%, respectively. These  
222 low utilization values reflect the short discharge intervals used for proof-of-concept battery  
223 evaluation rather than full Zn consumption.

#### 224 **2.7.2 Discussion of the FE<sub>CH4</sub> difference between the three-electrode eCO<sub>2</sub>RR system and the** 225 **AZCB device**

226 The lower  $FE_{CH_4}$  observed in the AZCB device compared with the maximum value achieved in  
227 the three-electrode  $eCO_2RR$  system mainly arises from the fundamentally different operating  
228 conditions of these two configurations. In the three-electrode flow electrolyser, the cathode  
229 potential can be independently controlled and optimized, allowing electron transfer to be directed  
230 more selectively toward the  $CO_2$ -to- $CH_4$  pathway. By contrast, in the full two-electrode AZCB,  
231 the cathodic  $eCO_2RR$  is coupled with Zn oxidation, governed by the overall battery discharge  
232 process including current load, internal resistance, ion transport, and gas-supply conditions.  
233 Consequently, the cathodic electron flow is less selectively utilized for  $CH_4$  formation and is more  
234 strongly influenced by polarization losses and competing HER during practical battery operation.  
235 Moreover, the lower  $CO_2$  flow rate in the AZCB further limits local  $CO_2$  availability at the cathode  
236 interface, leading to a lower  $FE_{CH_4}$  than that observed in the optimized half-cell measurement.

### 237 **3. Computational methods**

238 When studying the N-Cu-BTC catalyst, computational techniques were employed in parallel with  
239 experimental data to provide theoretical insights into the structure and electron configuration of  
240 the catalyst. The methods incorporated density functional theory estimates and structural  
241 optimization to simulate the supporting role of the catalyst in heterogeneous catalytic and  
242 electrochemical processes.

243 In the first stage, the structure of N-Cu-BTC was simulated using data extracted from the  
244 diffraction patterns of the unit cell and SEM images. These XRD patterns were used for the  
245 identification of the crystal structure and lattice parameters of both the parent Cu-BTC and the  
246 nitrogen-doped N-Cu-BTC framework. Therefore, the crystal face of the structure was cut and  
247 enlarged to simulate the material's behavior in both the bulk and at the surface. Based on the XPS  
248 analysis, the presence of nitrogen species in N-Cu-BTC was considered. Further, it introduced the  
249 nitrogen functional groups to the theoretical model by modifying the ligand framework.

250 The computational calculations were performed using the MedeA-VASP package, applying  
251 density functional theory (DFT) with a plane-wave basis set. The electron-ion interactions were  
252 treated within the projector augmented wave (PAW) method, while the electron-electron  
253 exchange-correlation interactions were described using the PBE functional. This functional,  
254 belonging to the category of the generalized gradient approximation (GGA), was designed to  
255 achieve a reasonable computational time and acceptable accuracy in describing the structural and  
256 electronic characteristics.

257 For structure optimization, the RMM-DIIS technique was employed to maintain high  
258 computational speed while minimizing errors. The cutoff energy for the plane-wave method was  
259 400 eV, and the integration thresholds for electronic self-consistent iterations and ion optimization  
260 were  $10^{-4}$  eV and  $10^{-5}$  eV, respectively. Since the calculations of energy can be sensitive to the  
261 smearing width of partially occupied electronic states, a Gaussian smearing width of 0.05 eV was  
262 maintained in this work.

263 The Brillouin zone was sampled with a 1x1x1 Monkhorst-Pack grid, which was enough to seek  
264 the unit cell size of N-Cu-BTC. To incorporate information on strong electron correlation effects  
265 in the d-orbitals of the Cu atoms, Hubbard-U corrections (DFT+U) were employed to enhance the  
266 reliability of the model in transition metal-based systems.

267 Electron density maps and adsorption energy calculations were performed to study the adsorption  
268 of CO<sub>2</sub> on the N-Cu-BTC catalyst surface. The nitrogen doping sites were also examined to  
269 determine the new electron density and any potential for a new active site. Further, the atomic  
270 structure of the films proposed by the model was compared with real XRD patterns and electronic  
271 properties.

272 These computational methods enabled the revelation of structural characteristics, electronic  
273 properties, and catalytic activity of N-Cu-BTC, facilitating a better understanding of the  
274 performance benefits of N-Cu-BTC compared to Cu-BTC.

275 To better reflect the real electrocatalytic environment and clarify the limitations of the present DFT  
276 model, the following considerations were included in the revised analysis. In the present work, the  
277 DFT model was constructed using a simplified Cu-BTC unit-cell framework with idealized  
278 nitrogen incorporation in order to capture the dominant electronic-structure and reaction-energy  
279 trends at a computationally practical level. To better approximate the real aqueous electrocatalytic  
280 environment, the solvent effect was further considered using the VASPSOL implicit solvent model  
281 with a dielectric constant of 78.5. After introducing the solvent correction, the absolute energetics  
282 of the adsorbed intermediates were modified to some extent, but the overall mechanistic trend  
283 remained unchanged, namely that nitrogen incorporation lowers the free-energy barrier of the key  
284 \*CO → \*CHO step. The DFT results are interpreted as relative mechanistic trends rather than a  
285 complete quantitative description of the operating electrochemical interface.

286 **4. Supporting Figures**

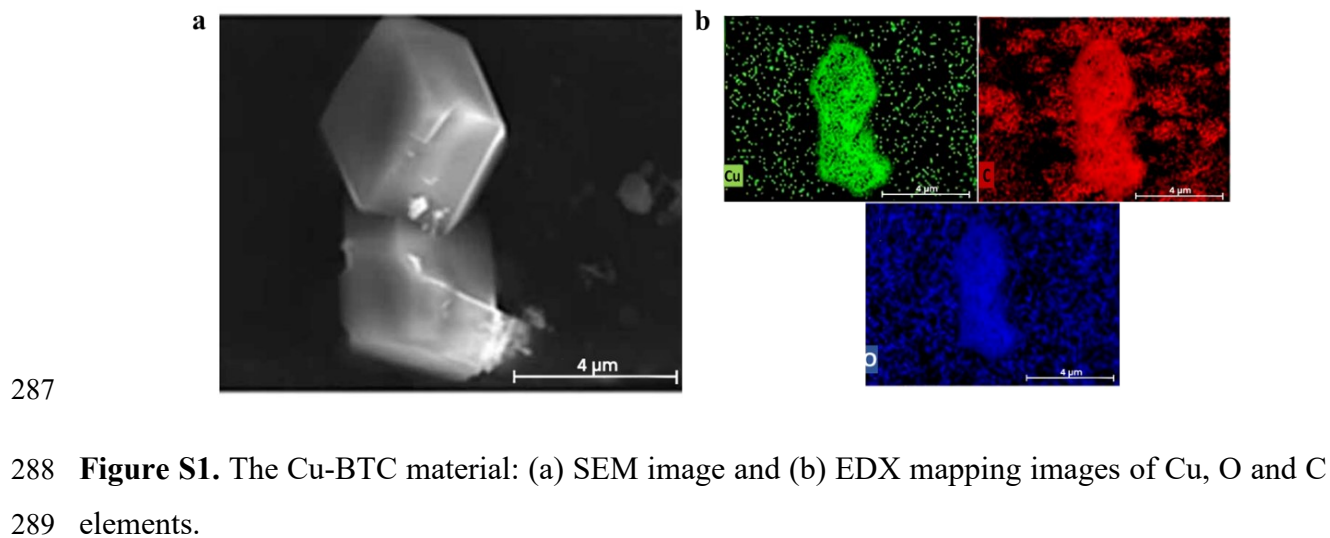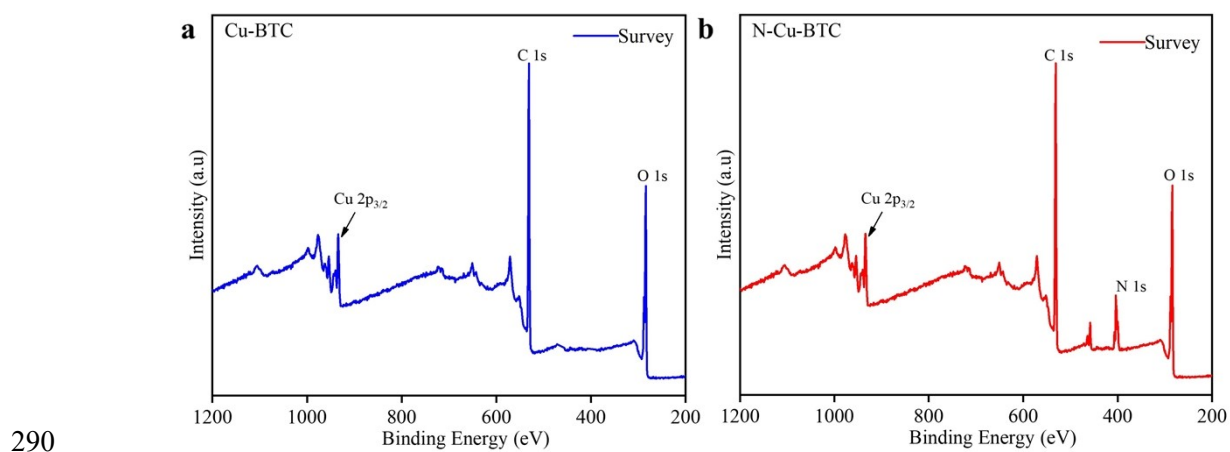

291 **Figure S2.** XPS survey spectra of the (a) Cu-BTC and (b) N-Cu-BTC catalyst.

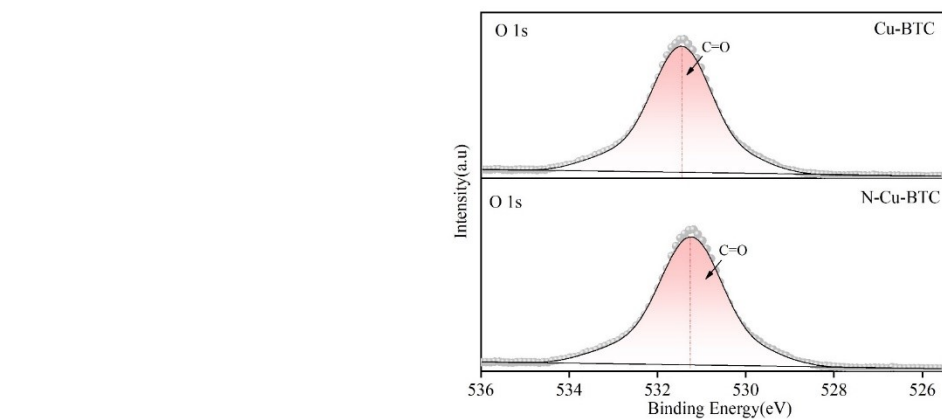

**Figure S3.** O 1s spectrum of Cu-BTC and N-Cu-BTC.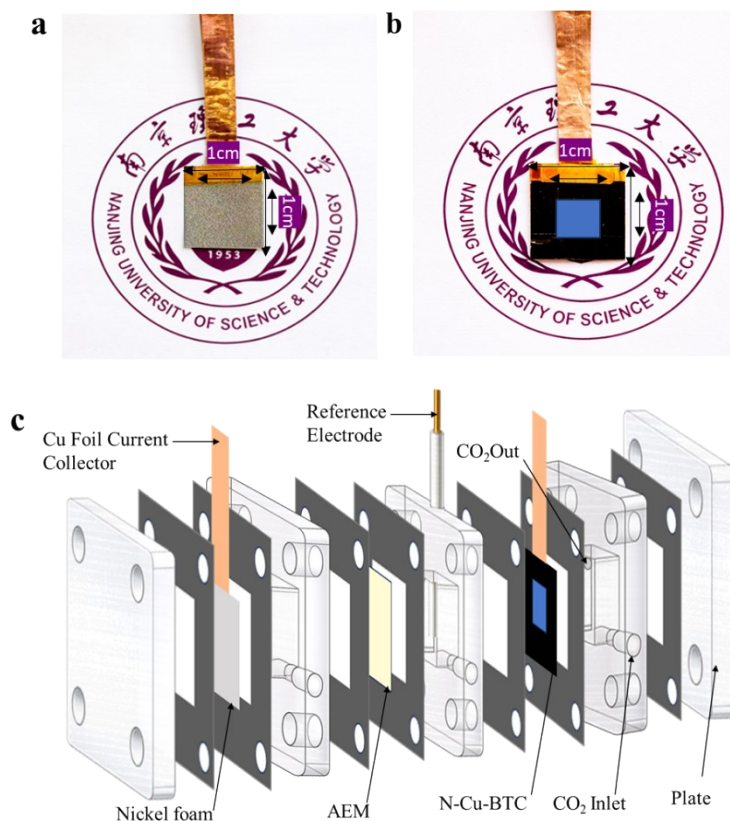

294

295 **Figure S4.** Photographs of (a) the nickel-foam counter electrode, (b) the catalyst-coated working  
 296 electrode and (c) schematic illustration of the three-chamber flow-type eCO<sub>2</sub>RR cell assembly. For  
 297 battery testing, we remove the reference electrode and replace the nickel foam with Zn plates.

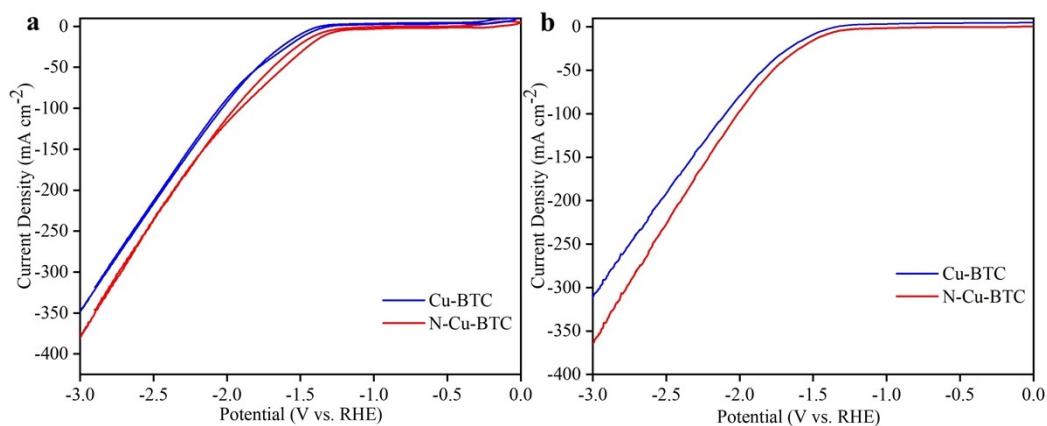

298

299 **Figure S5.** (a) CV and (b) LSV curves of eCO<sub>2</sub>RR promoted by Cu-BTC and N-Cu-BTC.

300

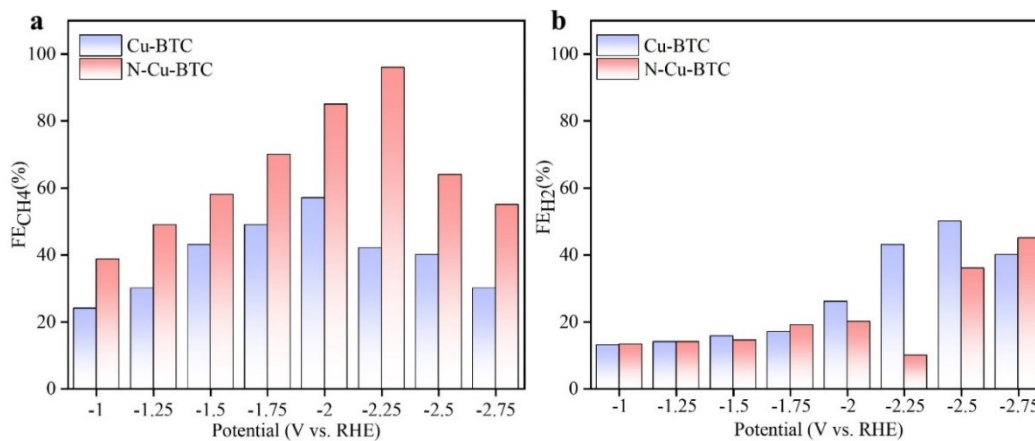

301

302

303 **Figure S6.** (a)  $EF_{CH_4}$  and (b)  $FE_{H_2}$  of  $eCO_2RR$  catalyzed by Cu-BTC and N-Cu-BTC.

304

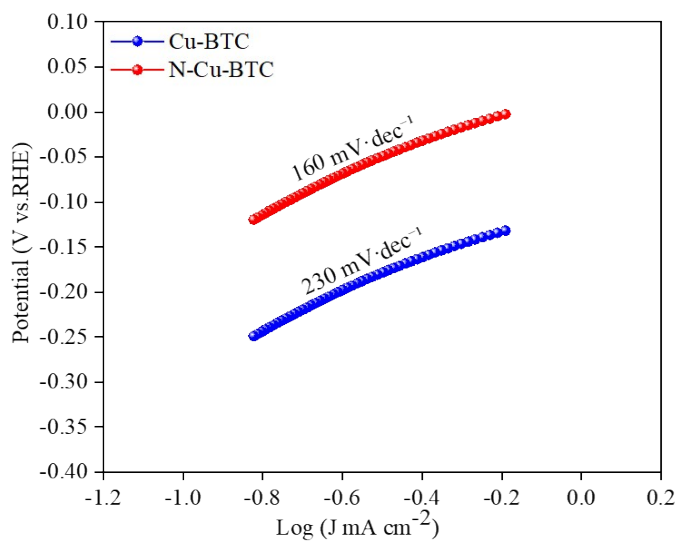

305

306 **Figure S7.** Tafel plots of  $eCO_2RR$  catalyzed by Cu-BTC and N-Cu-BTC.

307

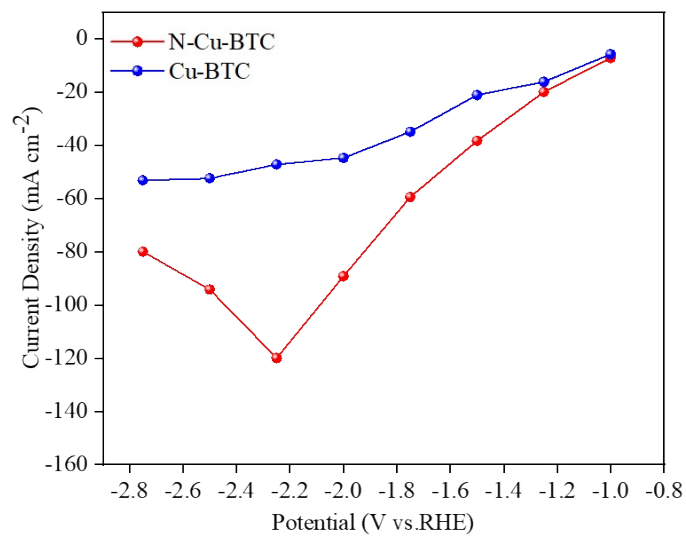

308

309 **Figure S8.** Partial current density for CH<sub>4</sub> formation during eCO<sub>2</sub>RR catalyzed by Cu-BTC and  
310 N-Cu-BTC.

311

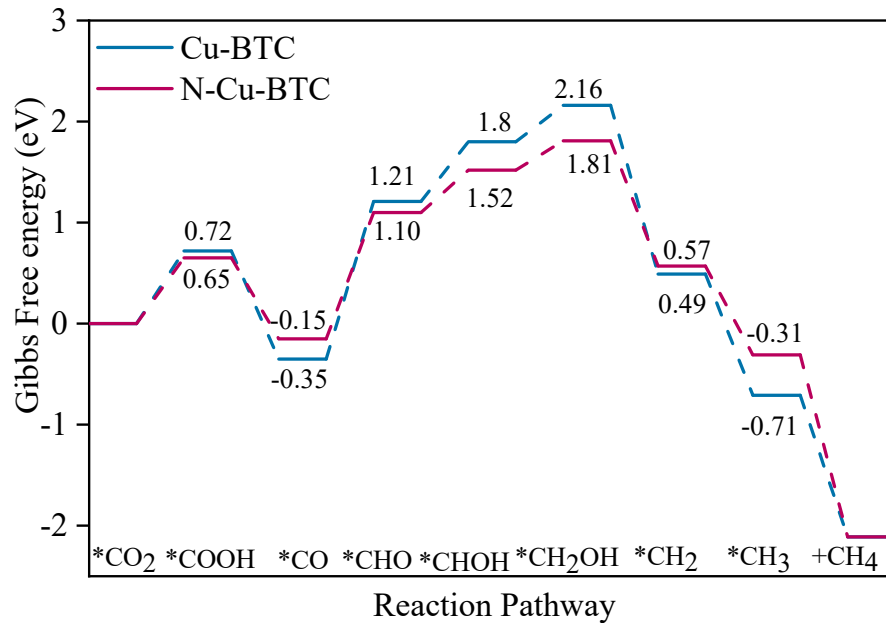

312

313 **Figure S9:** The reaction diagram corrected by VASPSOL considering the solvation effect.

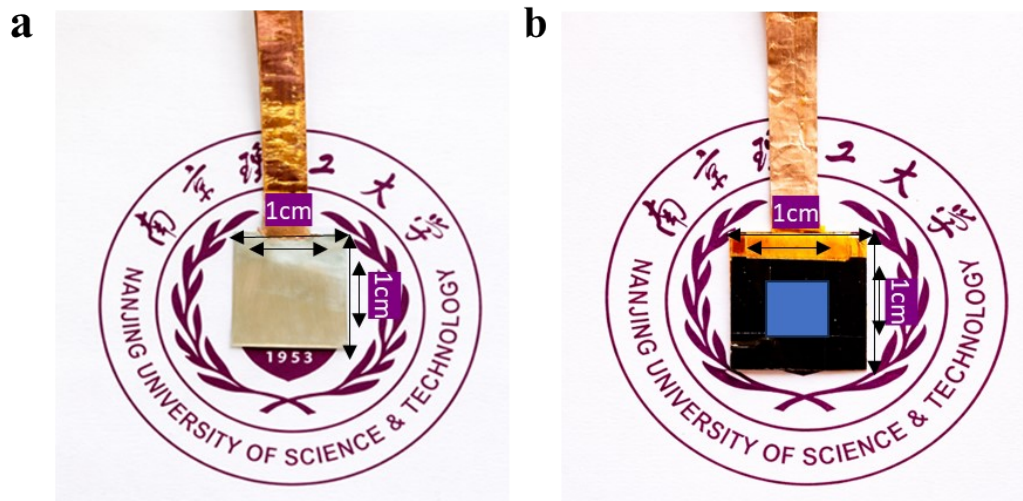

314

315 **Figure S10.** (a) The Zn anode and (b) N-Cu-BTC working electrode used in the three-chamber  
 316 flow-type AZCB.

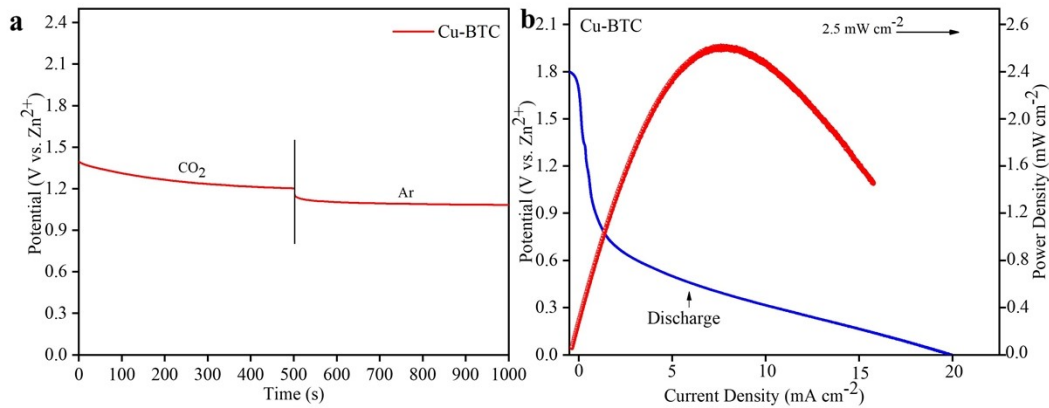

317

318 **Figure S11.** (a) OCP curves of the Cu-BTC constructed AZCB against CO<sub>2</sub> and Ar  
 319 gases; (b) Discharge response along power density.

320

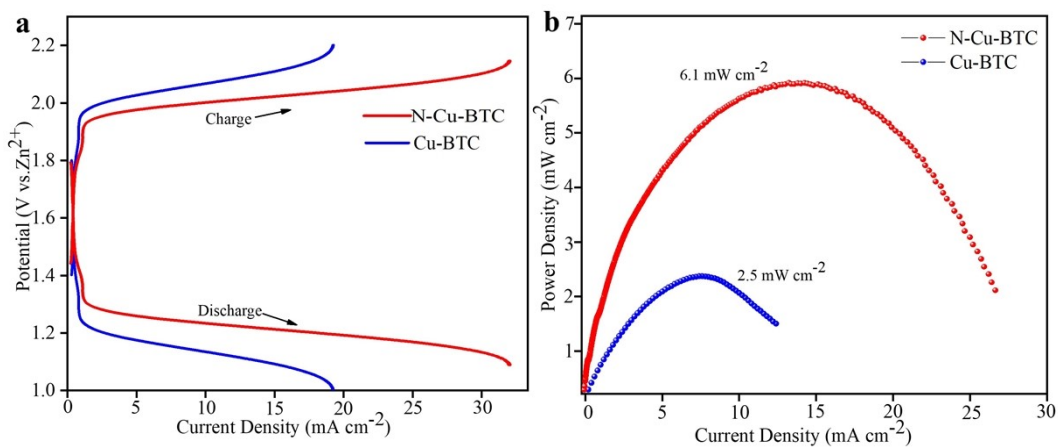

321

322 **Figure S12.** (a) Polarization charge and discharge curves and (b) Power density curves for AZCBs  
 323 using Cu-BTC and N-Cu-BTC.

324

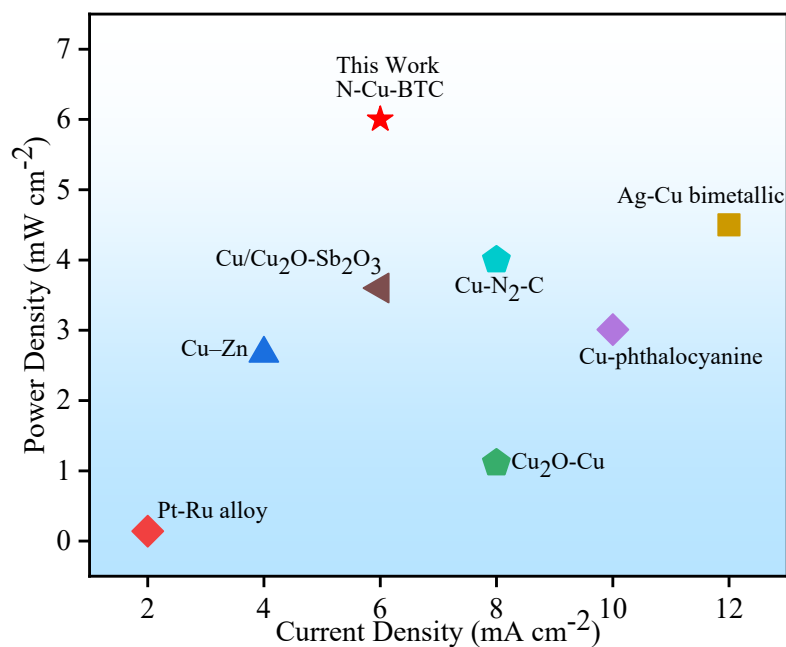

325

326 **Figure S13.** Comparison of power densities between this work and reported data with CH<sub>4</sub> as the  
 327 eCO<sub>2</sub>RR product.

328

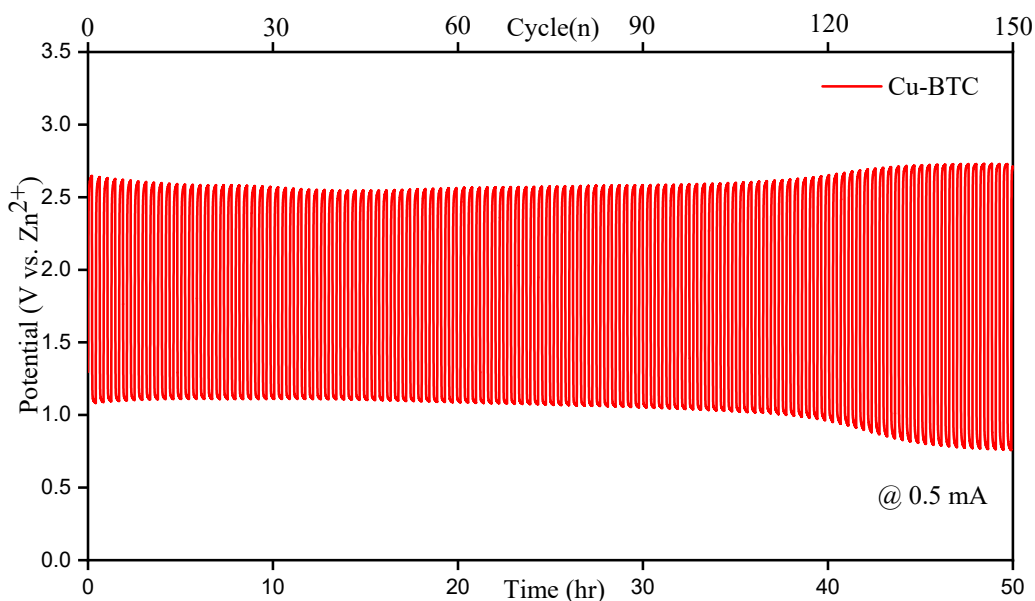

329

330 **Figure S14.** The galvanostatic cyclability curve at a current density of 0.5 mA cm<sup>-2</sup> for Cu-BTC.

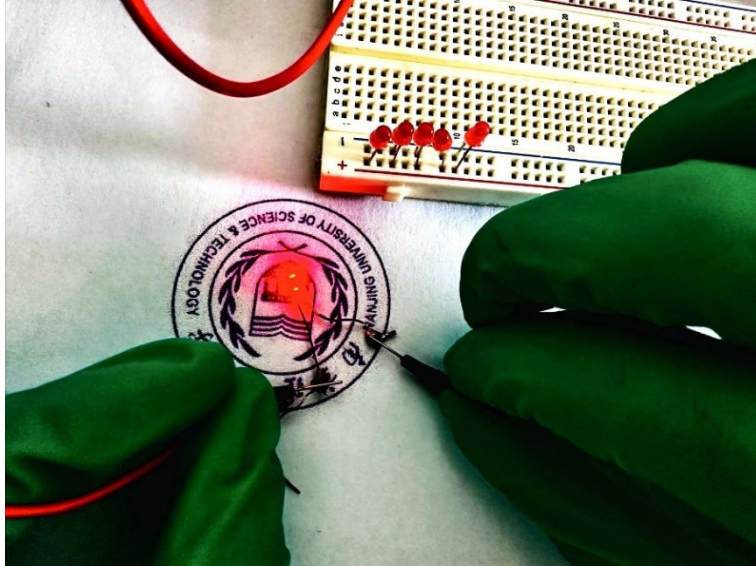

331

332 **Figure S15.** Digital photograph for single bulb illuminated by three series of an N-Cu-BTC  
333 AZCBs.

334

335

**Table S1.** Comparison of  $FE_{CH_4}$  of  $eCO_2RR$  using as-prepared electrodes

| Potential (V vs RHE) | Cu-BTC (CH <sub>4</sub> ) FE% | N-Cu-BTC(CH <sub>4</sub> ) FE% |
|----------------------|-------------------------------|--------------------------------|
| -1.0                 | 39                            | 38.7                           |
| -1.25                | 45                            | 49                             |
| -1.50                | 47                            | 58                             |
| -1.75                | 50                            | 70                             |
| -2.0                 | 56                            | 85                             |
| -2.25                | 45                            | 96                             |
| -2.50                | 42                            | 64                             |
| 2.75                 | 39                            | 50                             |

336

337 **Table S2.** Comparison of practical discharge capacity and Zn utilization of the Zn-CO<sub>2</sub> battery  
 338 with the theoretical Zn capacity at different discharge currents

| Current (mA) | Time (h) | Practical Capacity (mAh) | Specific Capacity (mAh g <sup>-1</sup> ) | Zn Utilization (%) |
|--------------|----------|--------------------------|------------------------------------------|--------------------|
| 0.5          | 0.083    | 0.042                    | 0.073                                    | 0.009              |
| 1            | 0.083    | 0.083                    | 0.145                                    | 0.017              |
| 2            | 0.083    | 0.166                    | 0.291                                    | 0.035              |
| 3            | 0.083    | 0.250                    | 0.437                                    | 0.053              |
| 4            | 0.083    | 0.333                    | 0.583                                    | 0.071              |
| 5            | 0.083    | 0.416                    | 0.729                                    | 0.088              |

339

**Table S3:** Comparison of aqueous Zn-CO<sub>2</sub> battery performance with reported data

| Catalyst               | Electrolyte                                                                                         | Product         | OCP  | Discharge voltage (V) | Power density (mW cm <sup>-2</sup> ) | Energy density (Wh kg <sup>-1</sup> ) | Ref       |
|------------------------|-----------------------------------------------------------------------------------------------------|-----------------|------|-----------------------|--------------------------------------|---------------------------------------|-----------|
| N-Cu-BTC               | <b>Anolyte:</b> 1 M KOH + 0.2 M Zn(ac) <sub>2</sub><br><b>Catholyte:</b> 1 M KOH                    | CH <sub>4</sub> | 1.55 | 0.55                  | 6.1 (15 mA cm <sup>-2</sup> )        | 332.4 Wh kg <sup>-1</sup>             | This work |
| Fe <sub>1</sub> NC/S - | <b>Anolyte:</b> 0.8 M KOH + 0.02 M Zn(ac) <sub>2</sub><br><b>Catholyte:</b> 0.8 M KHCO <sub>3</sub> | CO              | 0.72 | 0.21                  | 0.52 (2.5 mA cm <sup>-2</sup> )      | —                                     | 1         |
| P-Ag/CP                | <b>Anolyte:</b> 6 M KOH + 0.2 M Zn(ac) <sub>2</sub><br><b>Catholyte:</b> 0.8 M KHCO <sub>3</sub>    | CO              | 0.9  | 0.18                  | 0.37 (2.1 mA cm <sup>-2</sup> )      | —                                     | 2         |
| Ni@NC                  | <b>Anolyte:</b> 6 M KOH + 0.2 M Zn(ac) <sub>2</sub><br><b>Catholyte:</b> 1 M                        | CH <sub>4</sub> | —    | 0.20                  | 1.64 (8 mA cm <sup>-2</sup> )        | —                                     | 3         |

|                                |                                                                                                               |                                                    |     |      |                                   |     |   |
|--------------------------------|---------------------------------------------------------------------------------------------------------------|----------------------------------------------------|-----|------|-----------------------------------|-----|---|
|                                | KHCO <sub>3</sub>                                                                                             |                                                    |     |      |                                   |     |   |
| HPC–<br>Co/CoPc                | <b>Anolyte:</b> 6<br>M KOH +<br>0.2 M<br>Zn(ac) <sub>2</sub><br><b>Catholyte:</b><br>1 M<br>KHCO <sub>3</sub> | CO                                                 | —   | 0.50 | 2.67 (10<br>mA cm <sup>-2</sup> ) | 533 | 4 |
| VO-rich<br>SnO <sub>2</sub> NS | <b>Anolyte:</b> 1<br>M KOH<br><b>Catholyte:</b><br>0.1 M<br>KHCO <sub>3</sub>                                 | Forma<br>te                                        | —   | 1.00 | 3.67 (17<br>mA cm <sup>-2</sup> ) | 550 | 5 |
| Cu <sub>3</sub> P/C            | <b>Anolyte:</b> 4<br>M NaOH<br><b>Catholyte:</b><br>0.1 M<br>KHCO <sub>3</sub>                                | CO                                                 | 1.4 | 0.25 | 2.6 (10 mA<br>cm <sup>-2</sup> )  | —   | 6 |
| CuO/Cu-<br>BTC                 | <b>Anolyte:</b> 1<br>M KOH<br><b>Catholyte:</b><br>1 M KOH                                                    | C <sub>2</sub> H <sub>4</sub><br>+ CH <sub>4</sub> | —   | —    | 3.4                               | —   | 7 |
| N-Cu-<br>MOF NS                | <b>Anolyte:</b><br>0.5 M<br>KHCO <sub>3</sub><br><b>Catholyte:</b><br>0.5 M<br>KHCO <sub>3</sub>              | CH <sub>4</sub>                                    | —   | —    | 2.9                               | —   | 8 |

|                        |                                                                                                  |                                                 |     |      |                               |       |    |
|------------------------|--------------------------------------------------------------------------------------------------|-------------------------------------------------|-----|------|-------------------------------|-------|----|
| Cu-BTC/Ag Hybrid       | <b>Anolyte:</b> 6 M KOH + 0.2 M Zn(ac) <sub>2</sub><br><b>Catholyte:</b> 0.8 M KHCO <sub>3</sub> | CO + CH <sub>4</sub>                            | —   | —    | 2.1                           | —     | 9  |
| Cu-BTC-derived Cu@C    | <b>Anolyte:</b> 1 M KOH<br><b>Catholyte:</b> 1 M KOH                                             | CH <sub>4</sub> + C <sub>2</sub> H <sub>4</sub> | —   | —    | 4.8                           | —     | 10 |
| Pd/SnO <sub>2</sub> @C | <b>Anolyte:</b> 6 M KOH + 0.02 M Zn(ac) <sub>2</sub><br><b>Catholyte:</b> 1 M KHCO <sub>3</sub>  | Formate                                         | 1.4 | 1.38 | 4.29 (8 mA cm <sup>-2</sup> ) | 827.3 | 11 |

341

## 342 References

- 343 1. S. Gao, T. Wei, J. Sun, Q. Liu, D. Ma, W. Liu, S. Zhang, J. Luo and X. Liu, *Small Struct.*,  
344 2022, 3, 2200086.
- 345 2. J. Xie, Q. Liu, Y. Huang, M. Wu and Y. Wang, *J. Mater. Chem. A*, 2018, 6, 13952–13958.
- 346 3. Y. Liu, J. Chen, W. Li, Y. Zhang, X. Fu, E. Li, S. Jin, L.-M. Yang, Z. Tian, M. Antonietti and  
347 T. Liu, *Ind. Chem. Mater.*, 2024, 2, 514–532.
- 348 4. K. A. Adegoke and N. W. Maxakato, *J. CO<sub>2</sub> Util.*, 2023, 69, 102412.
- 349 5. X. Tan, S. Jia, X. Song, X. Ma, J. Feng, L. Zhang, L. Wu, J. Du, A. Chen, Q. Zhu, X. Sun and  
350 B. Han, *Chem. Sci.*, DOI:10.1039/D3SC02790B.
- 351 6. M. Peng, S. Ci, P. Shao, P. Cai and Z. Wen, *J. Nanosci. Nanotechnol.*, 2019, 19, 3232–3236.

- 352 7. Q. Wang, H. Wei, P. Liu, Z. Su and X.-Q. Gong, *Nano Res. Energy*, 2024, 3, e9120112.
- 353 8. Z. Yan, P. Gao, Z. Li, Y. Zhang, C. Hu, D. Cao and D. Cheng, *Small*, 2025, 21, 2500950.
- 354 9. S. Thoka, Z. Tong, A. Jena, T.-F. Hung, C.-C. Wu, W.-S. Chang, F.-M. Wang, X.-C. Wang,  
355 L.-C. Yin, H. Chang, S.-F. Hu and R.-S. Liu, *J. Mater. Chem. A*, 2020, 8, 23974–23982.
- 356 10. H. Wang, T. Wang, G. Dong, L. Zhang, F. Pan and Y. Zhu, *Inorganics*, 2025, 13, 130.
- 357 11. W. Guo, Y. Wang, Q. Yi, E. Devid, X. Li, P. Lei, W. Shan, K. Qi, L. Shi and L. Gao, *Front.*  
358 *Energy Res.*, 2023, 11, 1194674.
- 359 12. Q. Cui, G. Qin, W. Wang et al., *J. Mater. Chem. A*, 2019, 7, 14510–14518.
- 360 13. T. Mueller and G. Ceder, *J. Phys. Chem. B*, 2005, 109, 17974–17983.
- 361 14. Z. Xing, L. Hu, D. S. Ripatti, X. Hu and X. Feng, *Nat. Commun.*, 2021, 12, 136.
- 362 15. K. Yang, M. Li, T. Gao, G. Xu, D. Li, Y. Zheng, Q. Li and J. Duan, *Nat. Commun.*, 2024, 15,  
363 7060.
- 364
- 365
